# Supplementary material for: HBM4EU Occupational Biomonitoring Study on e-Waste—Study Protocol
Source: Int J Environ Res Public Health. 2021 Dec 9;18(24):12987. doi: 10.3390/ijerph182412987 (PMC8701897; doi:10.3390/ijerph182412987)
Supplement: Supplementary file 1 [file ijerph-18-12987-s001.zip › Supplementary material S6.pdf]

# HBM4EU Occupational Biomonitoring Study on e-Waste—Study Protocol

**HBM4EU E-Waste Study Team:** The HBM4EU e-waste study team consists of Kukka Aimonen <sup>11</sup>, Lasma Akulova <sup>17</sup>, Radia Bousoumah <sup>10</sup>, Argelia Castaño <sup>13</sup>, Adam Clarke <sup>7</sup>, Adrian Covaci <sup>14</sup>, Maurice van Dael <sup>1</sup>, Marta Esteban López <sup>13</sup>, Thomas Göeno, Martien Graumans <sup>1</sup>, Ogier Hanser <sup>10</sup>, Beata Janasik <sup>16</sup>, Kate Jones <sup>7</sup>, Laura Komarovska <sup>17</sup>, Sirpa Laitinen <sup>11</sup>, Carla Martins <sup>12</sup>, Linda Matisane <sup>17</sup>, Inese Martinson <sup>17</sup>, Rodrigo Moreira <sup>8</sup>, Darren Musgrove <sup>7</sup>, An van Nieuwenhuyse <sup>2,4</sup>, Ana Nogueira <sup>19</sup>, Linda Paegle <sup>17</sup>, Hermínia Pinhal <sup>19</sup>, Tiina Rantio <sup>11</sup>, Edna Ribeiro <sup>18</sup>, Anita Seile <sup>17</sup>, Marina Silva <sup>18</sup>, Sílvia Reis Santos <sup>19</sup>, Marjo Vänskä <sup>11</sup>, Riitta Velin <sup>11</sup>, Célia Ventura <sup>8,9</sup> and Wojciech Wasowicz <sup>16</sup>

<sup>1</sup> Radboud Institute for Health Sciences, Radboudumc, Nijmegen, The Netherlands

<sup>2</sup> Department of Health Protection, Laboratoire national de santé (LNS), Dudelange, Luxembourg

<sup>3</sup> Institute of Occupational Medicine (IOM), Edinburgh, EH14 4AP, UK

<sup>4</sup> Centre for Environment and Health, Department of Public Health and Primary Care, KU Leuven (University of Leuven), Kapucijnenvoer 35, 3000 Leuven, Belgium

<sup>5</sup> IDEWE, External service for prevention and protection at work, Heverlee, Belgium

<sup>6</sup> Department of Public Health, University of Copenhagen, Copenhagen, Denmark

<sup>7</sup> Health & Safety Executive, Buxton, SK17 9JN, UK

<sup>8</sup> INSA, National Institute of Health Dr. Ricardo Jorge, Department of Human Genetics, Lisbon, Portugal

<sup>9</sup> Centre for Toxicogenomics and Human Health, NOVA Medical School, Universidade NOVA de Lisboa, Lisbon, Portugal

<sup>10</sup> INRS, French National Research and Safety Institute, Vandœuvre-lès-Nancy, France

<sup>11</sup> Finnish Institute of Occupational Health, Helsinki, Finland

<sup>12</sup> NOVA National School of Public Health, Public Health Research Centre, Universidade NOVA de Lisboa, 1600-560 Lisbon, Portugal; Comprehensive Health Research Center (CHRC), Portugal.

<sup>13</sup> Instituto de Salud Carlos III, Madrid, Spain

<sup>14</sup> Toxicological Center, University of Antwerp, 2610 Wilrijk, Belgium

<sup>15</sup> Institute and Outpatient Clinic of Occupational, Social and Environmental Medicine, Friedrich-Alexander-Universität Erlangen-Nürnberg, Germany

<sup>16</sup> Nofer Institute of Occupational Medicine, Lodz, Poland

<sup>17</sup> Rīga Stradiņš University, Dzirciema street 16, Rīga, LV-1007, Latvia

<sup>18</sup> Health & Technology Research Center, ESTeSL- Escola Superior de Tecnologia da Saúde de Lisboa, Instituto Politécnico de Lisboa. Lisbon, Portugal

<sup>19</sup> INSA, National Institute of Health Dr. Ricardo Jorge, Department of Environmental Health, Lisbon, Portugal
